# Supplementary material
Source: publisher figshare collection journal article supplement (https://acs.figshare.com/ndownloader/files/3774622)
Supplement: Supplementary file 1 [file 3774622]

# Supporting information

## ***Ethyl 2-((4-chlorophenyl)amino)thiazole-4-carboxylate and derivatives are potent inducers of Oct3/4***

Xinlai Cheng,<sup>1</sup> Hiroki Yoshida,<sup>1</sup> Dena Raoofi,<sup>1</sup> Sawsan Saleh,<sup>1</sup> Hamed Alborzinia,<sup>1</sup> Frank Wenke,<sup>2</sup> Axel Göhring,<sup>2</sup> Stefanie Reuter,<sup>2</sup> Nancy Mah,<sup>3</sup> Heiko Fuchs,<sup>4</sup> Miguel A. Andrade-Navarro,<sup>3</sup> James Adjaye,<sup>4</sup> Sheraz Gul,<sup>5</sup> Jochen Utikal,<sup>6</sup> Ralf Mrowka,<sup>2\*</sup> Stefan Wölfl<sup>1\*</sup>

<sup>1</sup>*Institute of Pharmacy and Molecular Biotechnology, Heidelberg University, Im Neuenheimer Feld 364, D-69120 Heidelberg, Germany*

<sup>2</sup>*Experimentelle Nephrologie. KIM III, Universitätsklinikum Jena, Am Nonnenplan 2-4, D-07743 Jena, Germany*

<sup>3</sup>*Institute for Stem cell Research and Regenerative Medicine. Medical Faculty, Heinrich Heine University, Duesseldorf, Germany*

<sup>4</sup>*Max Planck Institute for Molecular Genetics, Molecular Embryology, Berlin, Germany*

<sup>5</sup>*European Screening Port GmbH, Hamburg, Germany*

<sup>6</sup>*Skin Cancer Unit, German Cancer Research Center (DKFZ), Heidelberg and Department of Dermatology, Venereology and Allergology, University Medical Center Mannheim, Ruprecht-Karl University of Heidelberg, Mannheim, Germany.*

|                                                         |            |
|---------------------------------------------------------|------------|
| <b>SI. 1: Activation of Oct3/4 in NCCIT-Oct3/4.....</b> | <b>SI2</b> |
| <b>SI. 2: Activation of Nanog in NCCIT-Nanog.....</b>   | <b>SI3</b> |
| <b>SI. 3: Alkaline phosphatase staining.....</b>        | <b>SI4</b> |
| <b>SI. 4: Structure optimization.....</b>               | <b>SI5</b> |
| <b>SI . 5: Amidation of compound 22.....</b>            | <b>SI6</b> |

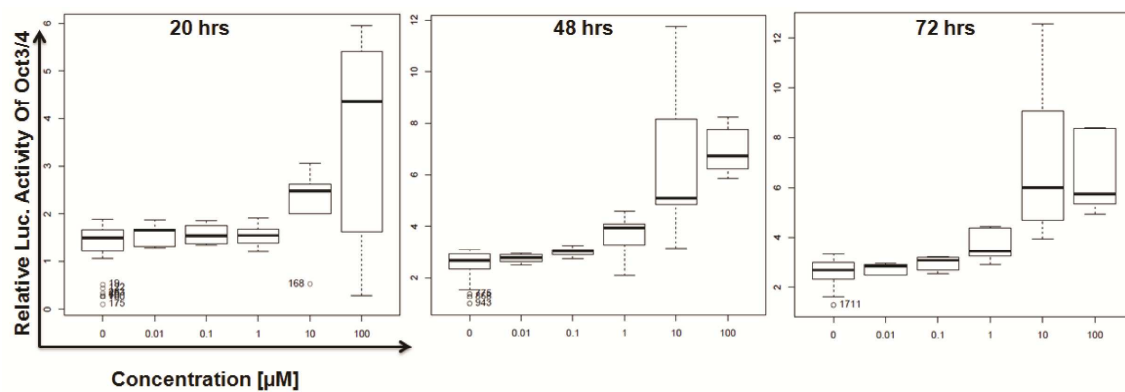

SI. 1: Activation of Oct3/4 in NCCIT-Oct3/4 treated with O4I2. The results at three time points were selected and analyzed.

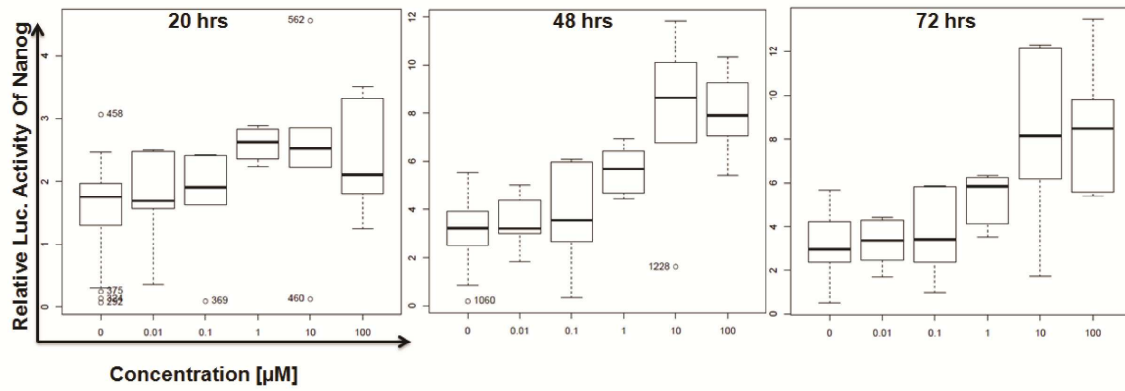

SI. 2: Activation of Nanog in NCCIT-Nanog cells treated with O4I2. The results at three time points were selected and analyzed.

5 Days ALP/PI

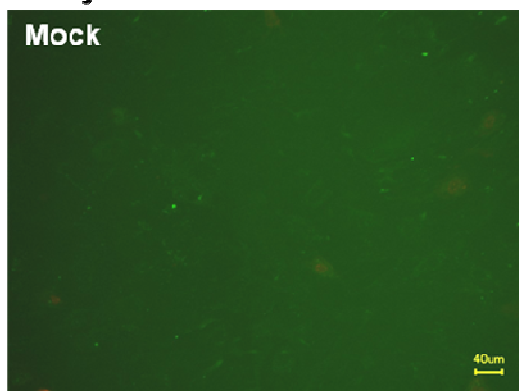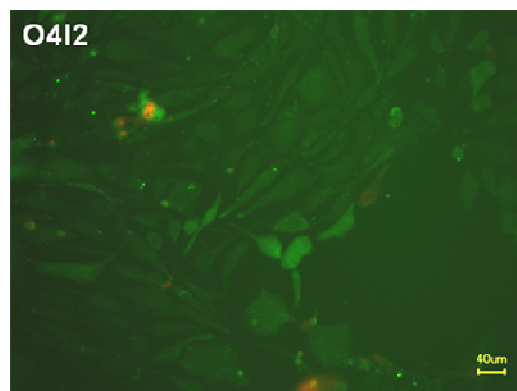

SI. 3: Alkaline phosphatase staining. The HF cells were treated with O4I2 (20  $\mu$ M) for 5 days in hESC medium. DMSO (0.2%) was used as mock. PI was used to detect dead cells.

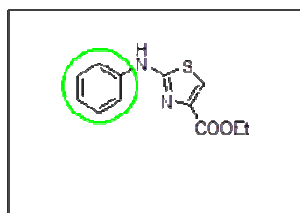

Phenyl-ring is important?

Yes

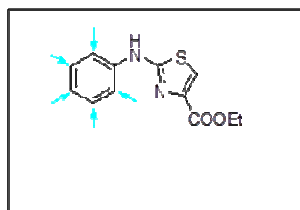

The size and position will influence?

Yes

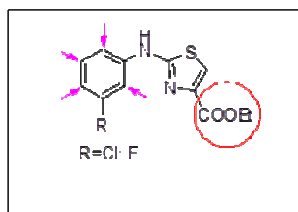

Conversion to acids is helpful?

No

An additional substituents is useful?

No

SI 4: Structure optimization

SI 5

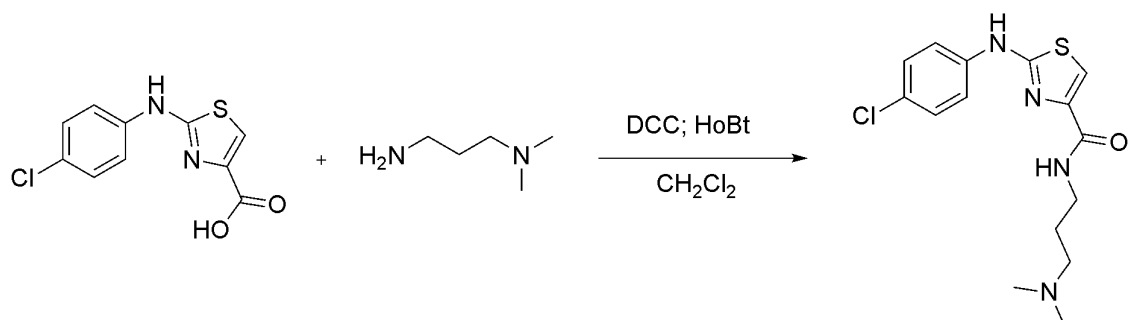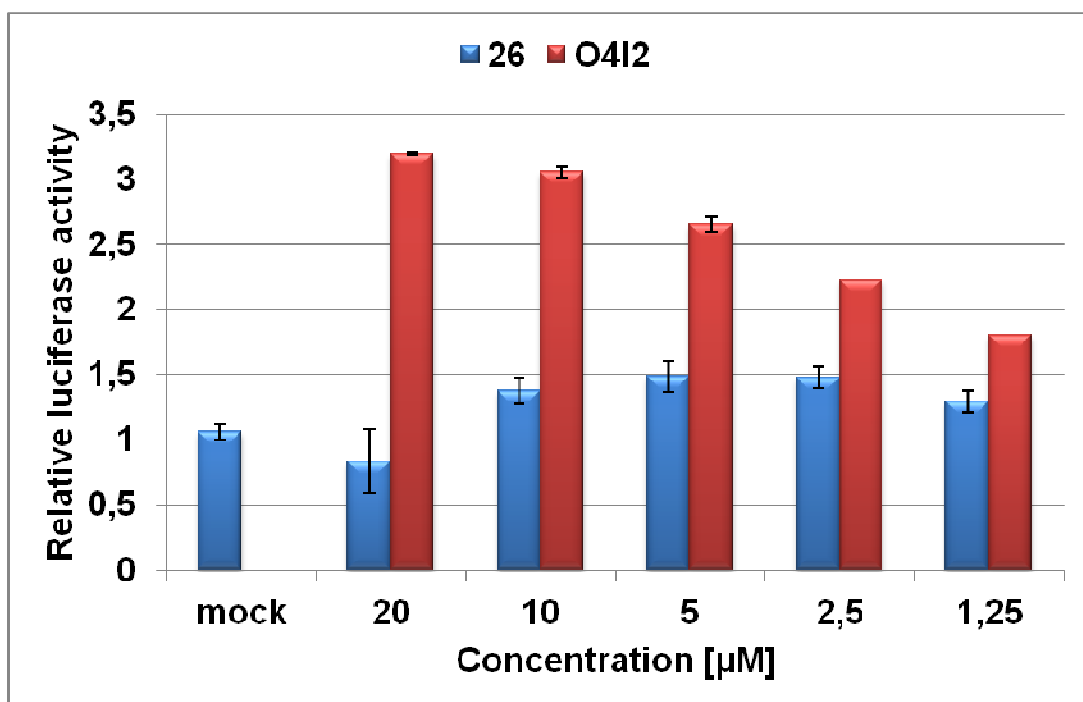

SI. 5: Synthesis of compound (26) and its activity in HEK-Oct3/4 in luciferase assay.
